# Supplementary material for: A Novel Organometallic Rhenium Salt: DNA-Binding and Cytotoxicity Studies on Pancreatic, Breast and Lymphoma Cancers
Source: Research Square preprint supplement (doi:10.21203/rs.3.rs-165666/v1), 2021-03-22
Supplement: Supplementary file 1 [file 5e4dbdd7480dc0d0859738d9.docx]

I0/I = 1 + Ksv [Q] (1)

KEB [EB] = Kapp [Complex **2**] (2)
